# Supplementary material for: Origin of unusual spinel-to-layered phase transformation by crystal water
Source: Royal Society of Chemistry journal article supplement (doi:10.1039/c7sc04114d), 2017-10-24
Supplement: c7sc04114d1.pdf [file c7sc04114d1.pdf]

## **Electronic Supporting Information**

# **Origin of Unusual Spinel-to-Layered Phase Transformation by Crystal Water**

Eunjeong Yang,<sup>a,†</sup> Heejin Kim,<sup>b,†</sup> Sangryun Kim,<sup>c</sup> In Kim,<sup>a</sup> Jaehoon Kim,<sup>a</sup> Hyunjun Ji,<sup>a</sup> Jang Wook Choi<sup>a,d,\*</sup> and Yousung Jung<sup>a,\*</sup>

---

<sup>a</sup> Graduate School of EEWS, Korea Advanced Institute of Science and Technology, 291 Daehak-ro, Daejeon, 34141, Republic of Korea.

<sup>b</sup> Electron Microscopy Research Center, Korea Basic Science Institute, 169-148 Gwahak-ro, Daejeon 34133, Republic of Korea.

<sup>c</sup> Institute for Materials Research, Tohoku University, Sendai 980-8577, Japan.

<sup>d</sup> School of Chemical and Biological Engineering and Institute of Chemical Processes, Seoul National University, 1 Gwanak-ro, Seoul 08826, Republic of Korea

<sup>e,†</sup> These authors contributed equally to this work.

## Experimental Section.

**Calculation details.** We performed spin polarized calculations using the Perdew-Burke-Ernzerhof (PBE) functional and projector-augmented wave (PAW) method as implemented in the VASP software.<sup>1-3</sup> An energy cutoff of 520 eV was used as a basis set, and the Monkhorst-Pack k-point mesh was sampled with a spacing of  $<0.03 \text{ \AA}^{-1}$ .<sup>4</sup> We applied the U correction in a rotationally invariant form to address the self-interaction of d-electrons in Mn ( $U_{\text{eff}} = 4.0$ ).<sup>5-7</sup> To include a dispersion interaction in considered system, the Grimme's D3 method with zero damping was employed.<sup>8</sup> While we used the D3 parameters optimized for PBE functional ( $S_6 = 1.0$ ,  $S_R = 1.217$ , and  $S_8 = 0.722$ ), the geometries and energetics obtained with PBE+U+D3 were comparable to the D3 corrected PBE0 method as shown in Table S1. For the PBE0 calculations, the D3 parameters of  $S_6 = 1.0$ ,  $S_R = 1.287$ , and  $S_8 = 0.928$  were used as tested by Grimme and co-workers (reference 31 in the text). Since the energy differences between ferromagnetic (FM) and antiferromagnetic (AFM) orderings are less than 0.1 eV (which is much smaller than the energy difference between spinel vs. layered phases by an order of magnitude), and the lowest energy magnetic structure is altered depending on the number of intercalated ions (Fig. S7), we assumed FM ordering for all calculations to minimize the unnecessary complications and potential artifacts arising from magnetic ordering. To obtain the ground structure, all geometries were fully relaxed until the remaining forces were less than  $0.01 \text{ eV \AA}^{-1}$ . The Bader analysis was used to obtain charge density and magnetic moment values; for these calculations, denser grid was used.<sup>9</sup> To estimate the energy barriers associated with Mn migration, we used the climbing-image nudged elastic band (CI-NEB) method in the  $2 \times 2 \times 1$  supercells.<sup>10</sup> To calculate the positively charged systems containing  $\text{H}_3\text{O}^+$  ion (Fig. S1), we changed the total number of electrons in the system.

**Li and Na intercalation geometry.** To obtain the insertion structure of Li and Na in the spinel  $\text{Mn}_2\text{O}_4$ , we used the  $\text{Mn}^{2+}$  dissolved  $\text{Mn}_3\text{O}_4$  as a starting geometry, which contains 8 Mn and 16 O atoms. This

empty spinel structure has 4 tetrahedral sites ( $4a$ ) and 8 octahedral sites ( $8c$ ) per unit cell, which are able to accommodate the Li or Na. We prepared all possible Li or Na intercalation orderings at these empty sites with symmetric considerations; and then we performed full geometry relaxation. As a result, both Na and Li atoms prefer the tetrahedral site by -0.22 and -0.42 eV per formula unit, respectively, compared with each octahedral site.

**Water intercalation geometry in the spinel structure.** For the  $\text{H}_2\text{O}$  and  $\text{H}_3\text{O}^+$  intercalation in the spinel structure, similar approach is adopted; that is, first we placed the  $\text{O}^w$  atom at the center of octahedral or tetrahedral site as the same way as Li or Na. Next, to determine the initial position of  $\text{H}^w$  atoms, we assumed that  $\text{H}^w$  atoms are located in the vertex direction of octahedron or tetrahedron to form hydrogen bonds with the O of spinel framework. Then, there are 6 and 4 possible  $\text{H}^w$  positions for each octahedral and tetrahedral sites, respectively. If the  $\text{H}^w$  occupies 2 (3) positions among total 6 or 4 positions, the inserted molecule will be the  $\text{H}_2\text{O}$  ( $\text{H}_3\text{O}^+$ ). After setting the initial position of  $\text{H}_2\text{O}$  or  $\text{H}_3\text{O}^+$  in above manner, we fully relaxed the atomic position and lattice parameters.

**Water intercalation geometry in the layered structure.** The initial position of crystal water in layered structures was determined by placing  $\text{O}^w$  in octahedral sites between  $\text{Mn}_2\text{O}_4$  layers. For that, we considered all possible configurations for a given composition (e.g. 70 configurations for  $n = 4$  in  $\text{Mn}_2\text{O}_4(\text{X})_{0.25n}$ ). Subsequently, we performed geometry optimization and the energetically most stable configuration was chosen for further analyses.

**Details on the Fig.S1.** First of all, we considered both  $\text{H}_3\text{O}^+$  and  $\text{H}_2\text{O}$  as the intercalation form of water molecules since both were observed in experiments, albeit a low concentration of  $\text{H}_3\text{O}^+$  in neutral pH condition. We suspect that the generation of proton on the surface of manganese oxide

could be one possible origin since the manganese oxide is well known electrocatalyst for water oxidation reaction. Fig. S1 is obtained spinel geometries for the intercalation of H<sub>2</sub>O and H<sub>3</sub>O<sup>+</sup> at octahedral and tetrahedral sites. For the H<sub>3</sub>O<sup>+</sup>, we additionally explored the positively charged system (Figure S1e and S1f), in which the Mn<sub>2</sub>O<sub>4</sub> framework do not take additional electrons for compensating the intercalated H<sub>3</sub>O<sup>+</sup> cation; this can be a chemical intercalation, or charging bias condition, or poor electron conduction case, or the very initial stage of intercalation process. The H<sub>2</sub>O and chemically intercalated H<sub>3</sub>O<sup>+</sup> prefer the tetrahedral site by -0.13 and -0.28 eV, respectively, while the H<sub>3</sub>O<sup>+</sup> with electrons is more stable at the octahedral site by -0.26 eV. This suggests that the H<sub>2</sub>O can intercalate into the tetrahedral site, while the H<sub>3</sub>O<sup>+</sup> can be located in both tetrahedral and octahedral sites depending on the above mentioned electronic conditions. We note that for all intercalation cases, the interplanar distance of (101) plane is around 5 Å as numbered in Figure S1. Also, we observed that the electrochemically inserted H<sub>3</sub>O<sup>+</sup> loses its one H<sup>w</sup> at the octahedral site ( $d_{\text{H}_2\text{O}-\text{H}^w} = 1.49 \text{ \AA}$ ); the latter H<sup>w</sup> atom then moves close to the Mn<sub>2</sub>O<sub>4</sub> framework, forming the OH terminal (Figure S1d).

**Details on the Fig.3c.** To obtain Fig. 3c, we used total 35 frameworks as follows:

- (1 conf.) one initial Mn<sub>2</sub>O<sub>4</sub> obtained from the Mn<sub>3</sub>O<sub>4</sub> structure, which is referenced as zero.
- (4 conf.) four spinel frameworks obtained from Mn<sub>2</sub>O<sub>4</sub>(Li)<sub>0.25n</sub> where n = 1, 2, 3, and 4.
- (4 conf.) four layered frameworks for Li. (n= 1, 2, 3, and 4)
- (8 conf.) four spinel and four layered frameworks for Na (n= 1, 2, 3, and 4 for each)
- (8 conf.) four spinel and four layered frameworks for H<sub>2</sub>O. (n= 1, 2, 3, and 4 for each)
- (8 conf.) four spinel and four layered frameworks for H<sub>3</sub>O<sup>+</sup>. (n= 1, 2, 3, and 4 for each)
- (2 conf.) empty (n=0) spinel and layered frameworks, respectively.

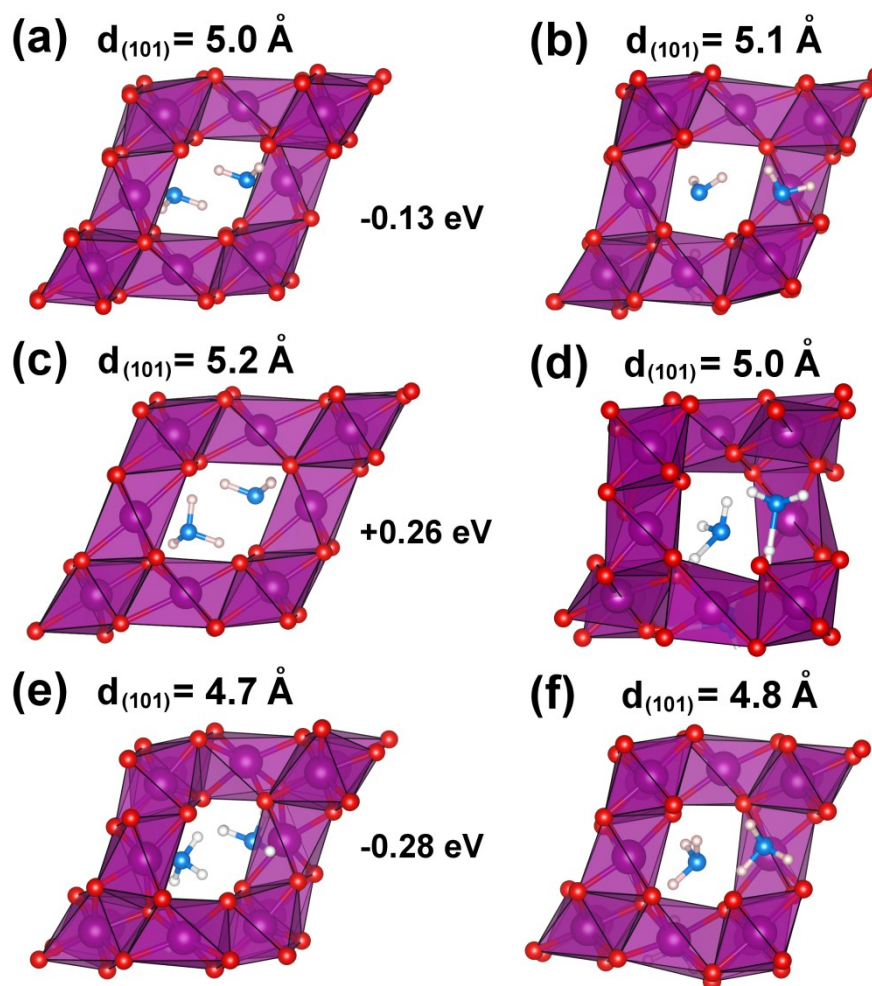

**Fig. S1.** The intercalation structure of  $\text{Mn}_2\text{O}_4(\text{X})_1$ : (a)  $\text{X} = \text{H}_2\text{O}$  at tetrahedral site, (b)  $\text{X} = \text{H}_2\text{O}$  at octahedral site, (c) electrochemical insertion of  $\text{X} = \text{H}_3\text{O}^+$  at tetrahedral site, (d) electrochemical insertion of  $\text{X} = \text{H}_3\text{O}^+$  at octahedral site, (e) chemical insertion of  $\text{X} = \text{H}_3\text{O}^+$  at tetrahedral site, (f) chemical insertion of  $\text{X} = \text{H}_3\text{O}^+$  at octahedral site. The  $d$  values are interplanar distance of (101) planes. Energy values are the relative energy of tetrahedral occupation case compared to each octahedral occupation case (negative value is more stable).

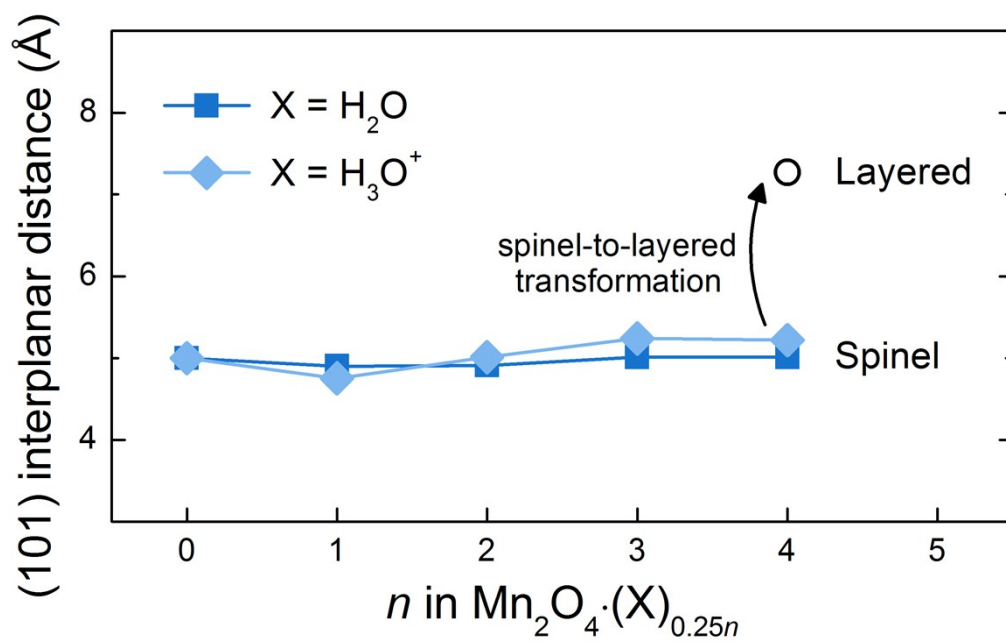

**Fig. S2.** The (101) plane distance of spinel and layered  $\text{Mn}_2\text{O}_4 \cdot (\text{H}_2\text{O})_{0.25n}$ .

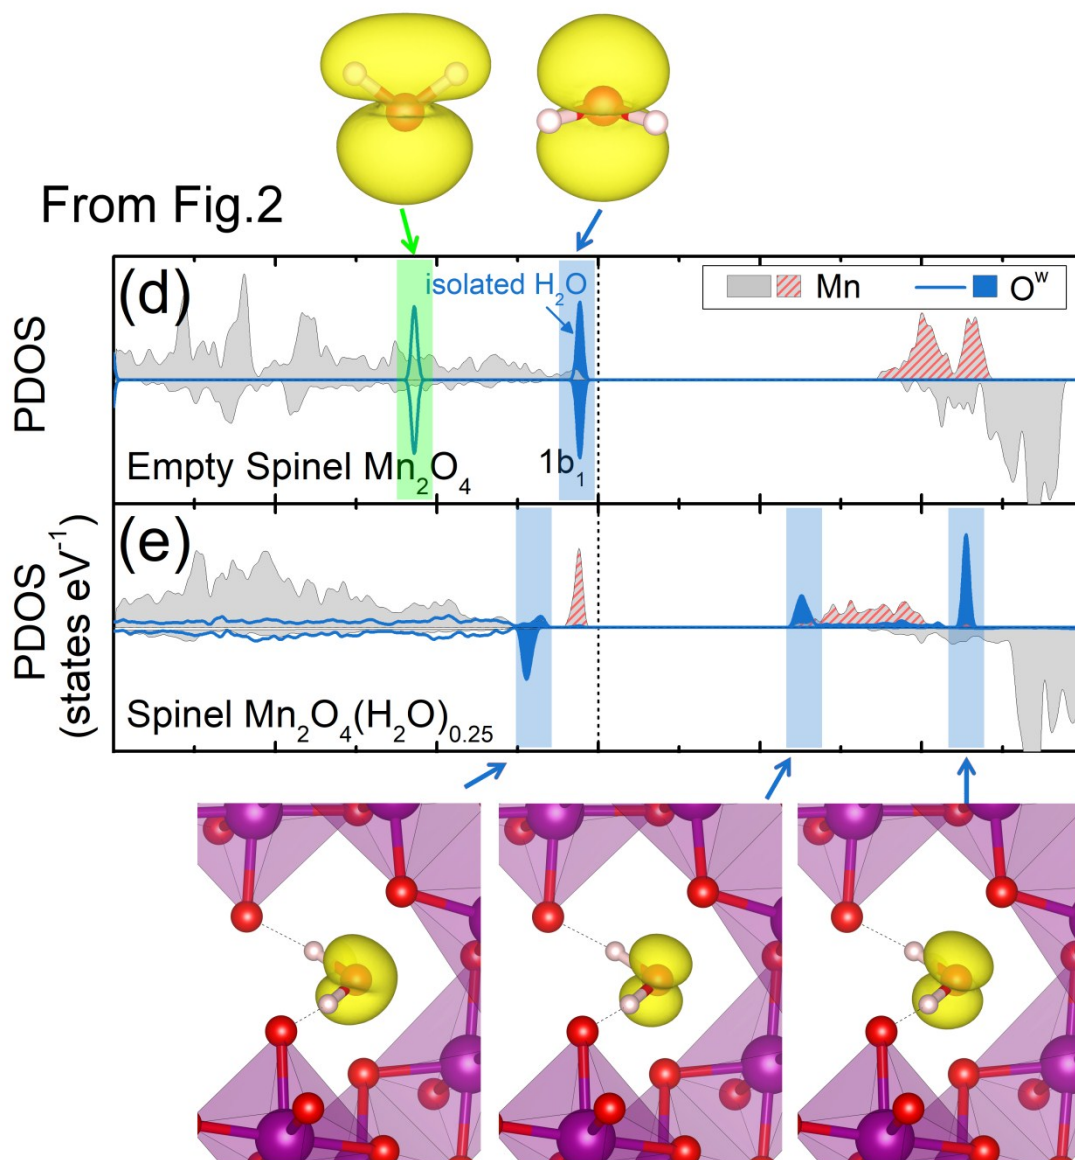

**Fig. S3.** The electron density isosurfaces which can reflect the shape of orbital. The  $1b_1$  orbital is the HOMO of isolated water molecule.

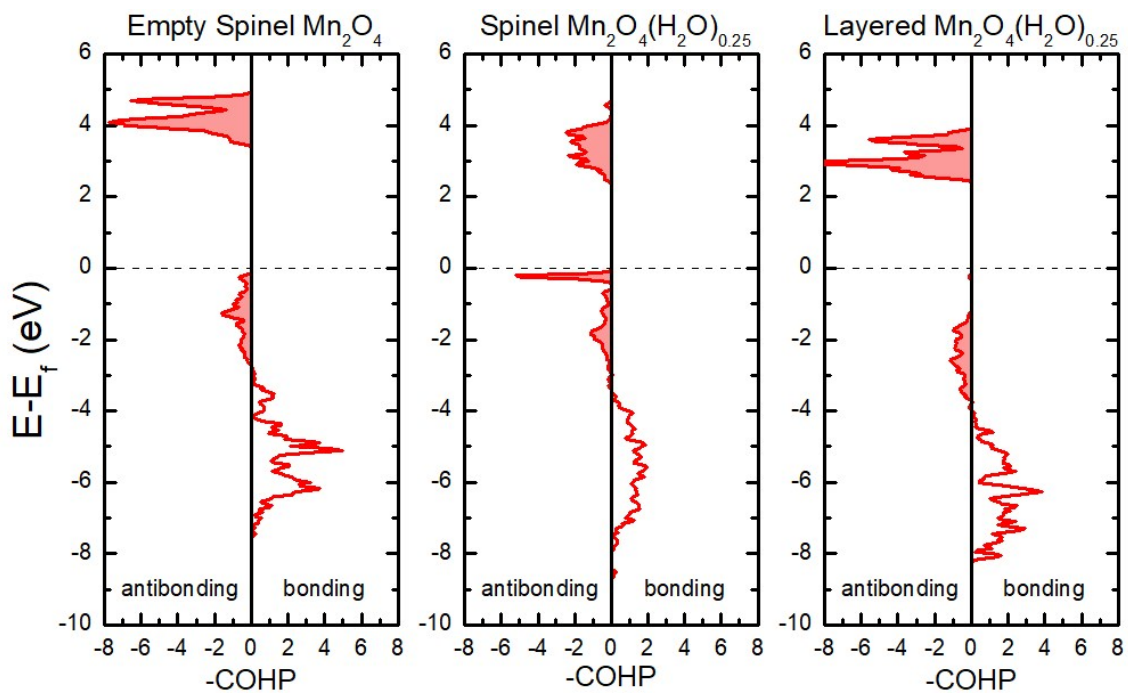

**Fig. S4.** The crystal orbital Hamilton population (COHP) of up spin electron between Mn center and 6 nearest neighbor oxygen atoms. In the empty spinel  $Mn_2O_4$ , states above the Fermi level are antibonding character (filled area). This antibonding orbital is occupied when water molecule intercalates into the spinel phase. PBE0 functional was used.



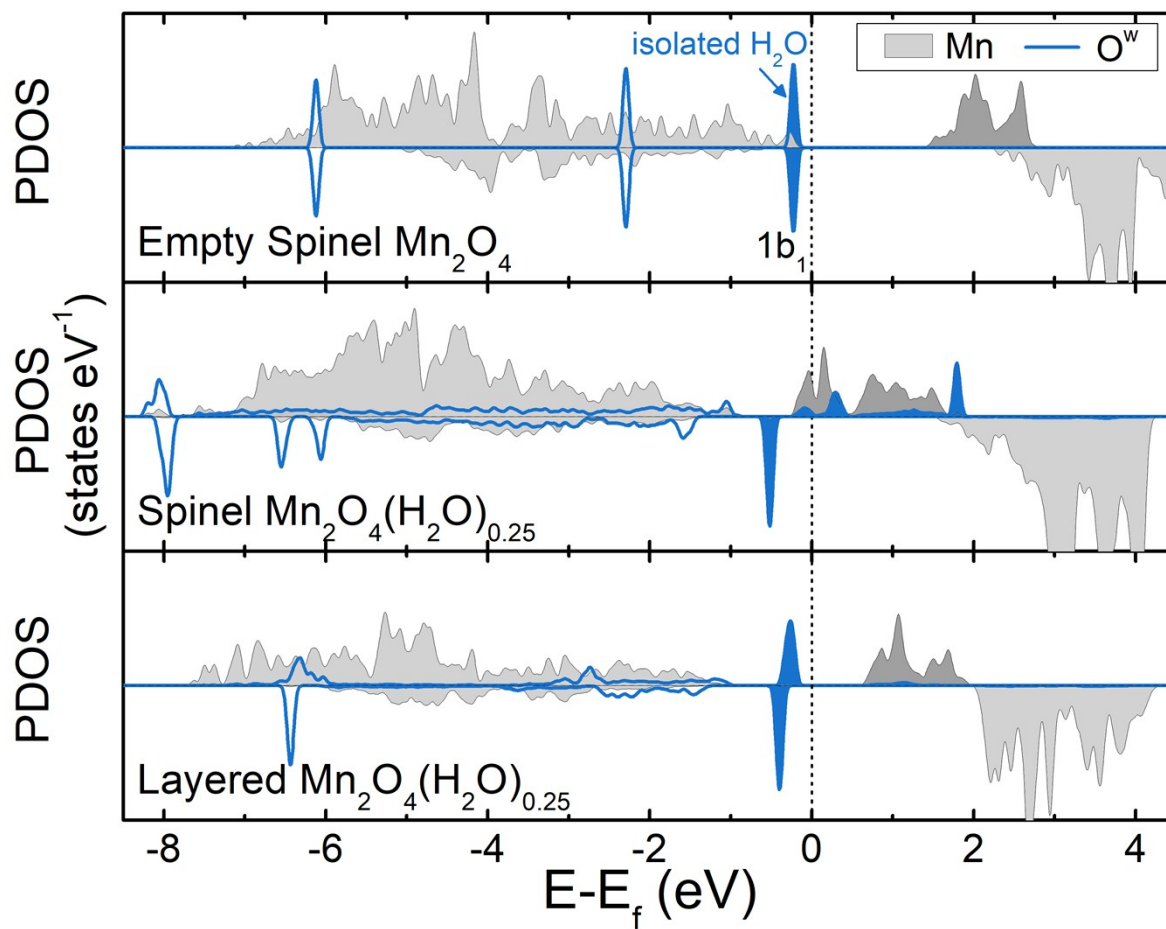

**Fig. S5.** The PDOS results obtained from GGA+U functional. The band gap is narrower than PBE0 functional, nevertheless, charge transfer phenomena are fundamentally identical to those in PBE0 functional.

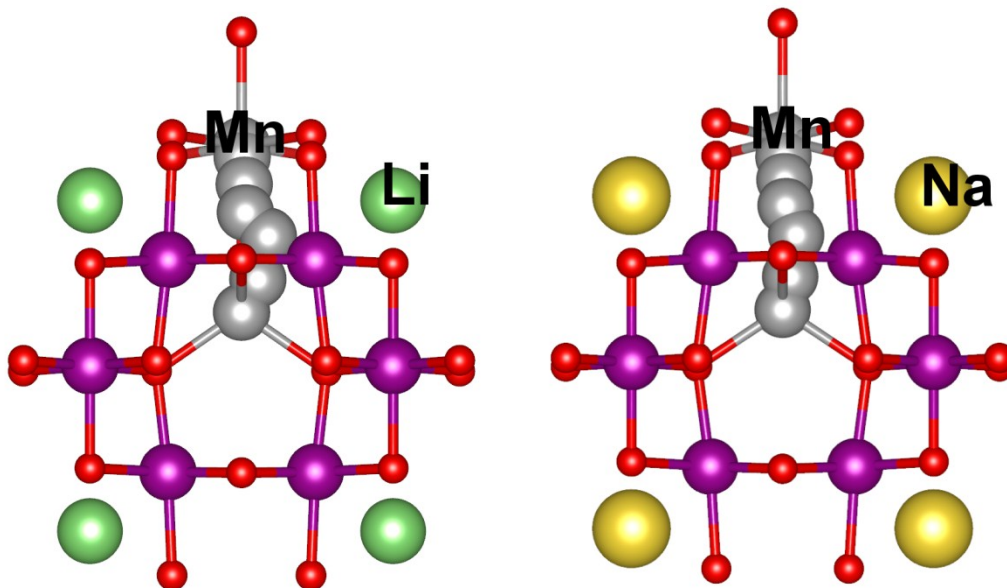

**Fig. S6.** The Mn migration pathway for Li and Na intercalated spinel structure. The closest distance from traveling Mn to Li (Na) is 2.68 Å (2.93 Å) due to the repulsion between cations. Color codes are identical to the Fig. 4b in the main text.

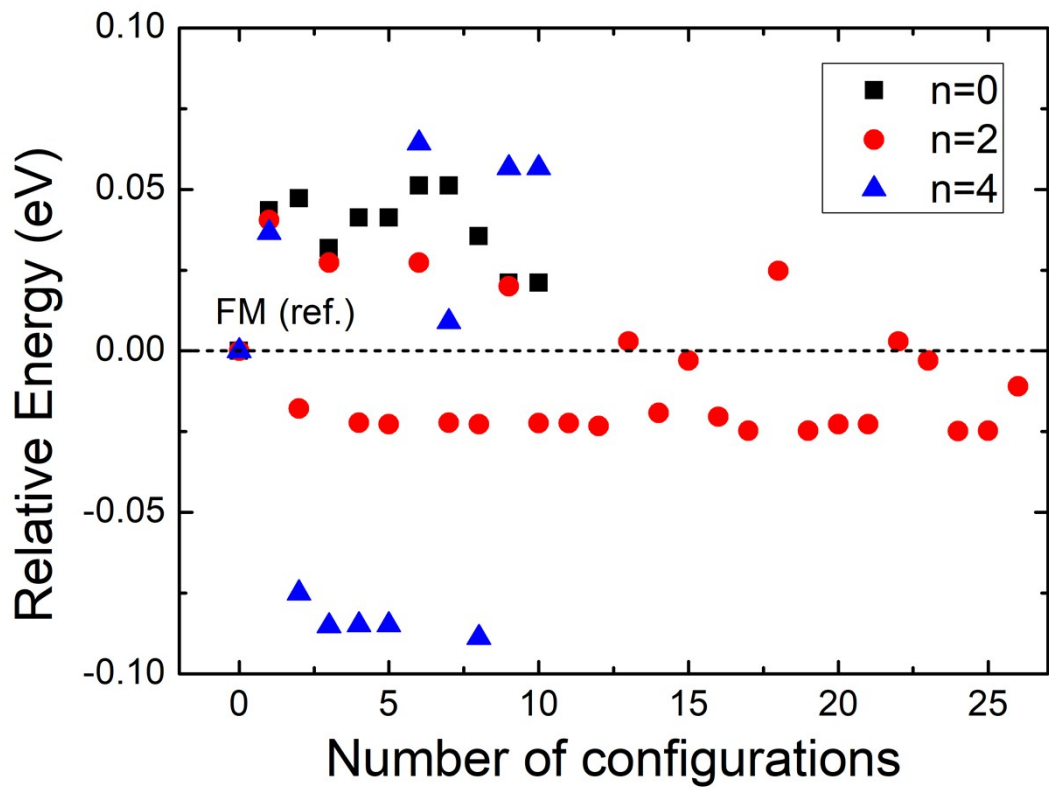

**Fig. S7.** Relative energy of AFM orderings in reference to the FM ordering.  $\text{Mn}_2\text{O}_4(\text{Li})_{0.25n}$  is used for comparison where  $n = 0, 2,$  and  $4$ .

**Table S1.** Comparison between PBE0 and PBE+U functionals with a dispersion correction of Grimme's D3 method. We performed full relaxation for limited cases due to the computational cost. The  $\Delta E_{L-S}$  tendency (Li > empty > Na) is consistent for both functionals. Lattice parameters of PBE+U were larger than PBE0 by 1–2% constantly.

| Structure                                          | Functional | $\Delta E_{L-S}$<br>[eV/Mn <sub>2</sub> O <sub>4</sub> ] | Lattice Parameters Difference (PBE+U - PBE0) |                |                |
|----------------------------------------------------|------------|----------------------------------------------------------|----------------------------------------------|----------------|----------------|
|                                                    |            |                                                          | a [%]                                        | b [%]          | c [%]          |
| empty<br>Mn <sub>2</sub> O <sub>4</sub>            | PBE+U      | -0.094                                                   | 2.22 (spinel)                                | 2.22 (spinel)  | 2.38 (spinel)  |
|                                                    | PBE0       | -0.102                                                   | 2.29 (layered)                               | 1.35 (layered) | 1.83 (layered) |
| Mn <sub>2</sub> O <sub>4</sub> (Li) <sub>1.0</sub> | PBE+U      | 0.283                                                    | 1.87 (spinel)                                | 1.87 (spinel)  | 1.83 (spinel)  |
|                                                    | PBE0       | 0.363                                                    | 2.06 (layered)                               | 1.38 (layered) | 1.09 (layered) |
| Mn <sub>2</sub> O <sub>4</sub> (Na) <sub>1.0</sub> | PBE+U      | -1.110                                                   | 1.93 (spinel)                                | 1.93 (spinel)  | 1.83 (spinel)  |
|                                                    | PBE0       | -1.138                                                   | 1.80 (layered)                               | 1.14 (layered) | 1.52 (layered) |

## References.

1. P. E. Blochl, *Physical Review B*, 1994, **50**, 17953-17979.
2. G. Kresse and J. Furthmuller, *Computational Materials Science*, 1996, **6**, 15-50.
3. J. P. Perdew, K. Burke and M. Ernzerhof, *Physical Review Letters*, 1996, **77**, 3865-3868.
4. H. J. Monkhorst and J. D. Pack, *Physical Review B*, 1976, **13**, 5188-5192.
5. S. L. Dudarev, G. A. Botton, S. Y. Savrasov, C. J. Humphreys and A. P. Sutton, *Physical Review B*, 1998, **57**, 1505-1509.
6. L. Wang, T. Maxisch and G. Ceder, *Physical Review B*, 2006, **73**.
7. F. Zhou, M. Cococcioni, C. Marianetti, D. Morgan and G. Ceder, *Physical Review B*, 2004, **70**, 235121.
8. S. Grimme, J. Antony, S. Ehrlich and H. Krieg, *The Journal of chemical physics*, 2010, **132**, 154104.
9. W. Tang, E. Sanville and G. Henkelman, *Journal of Physics: Condensed Matter*, 2009, **21**, 084204.
10. G. Henkelman, B. P. Uberuaga and H. Jónsson, *The Journal of chemical physics*, 2000, **113**, 9901-9904.
